# Supplementary figures and images for: CryoSat-2 Significant Wave Height in Polar Oceans Derived Using a Semi-Analytical Model of Synthetic Aperture Radar 2011–2019
Source: MDPI journal article supplement (doi:10.3390/rs13204166), 2021-10-18

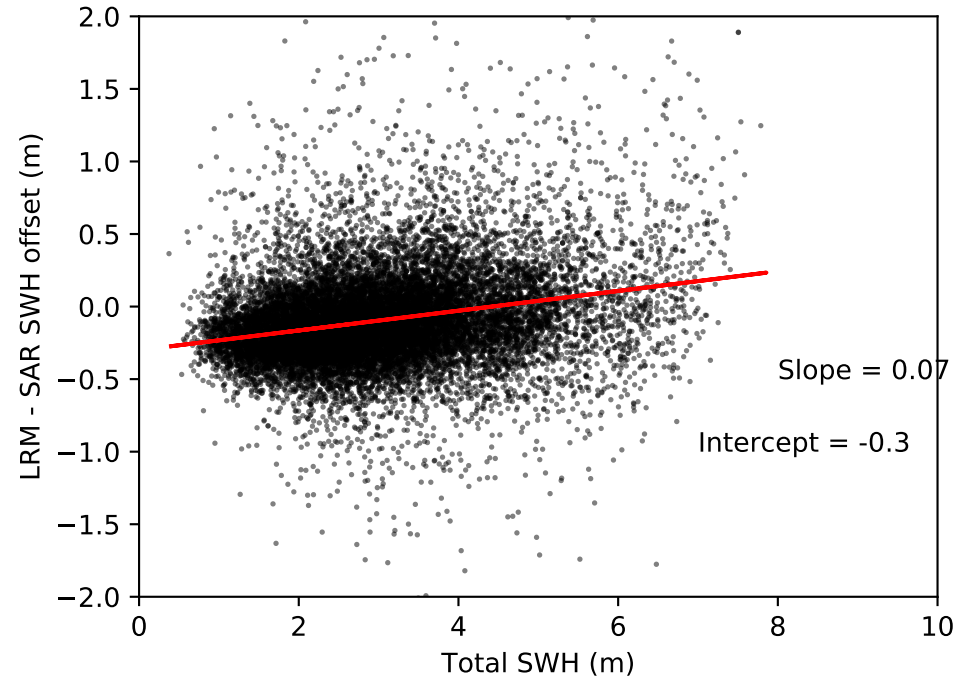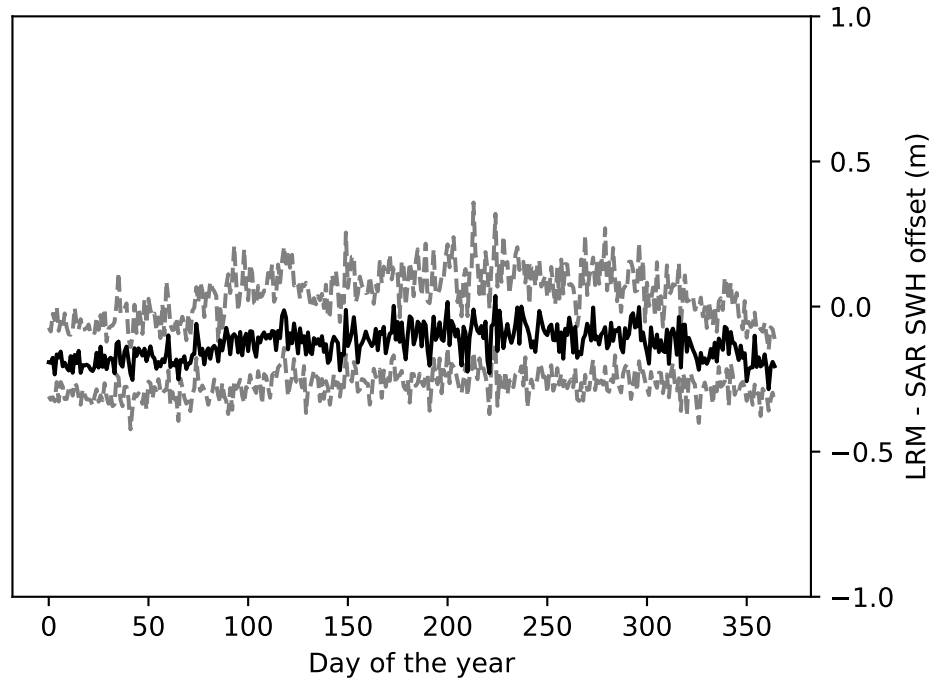

Supplement: s1 [file s1]

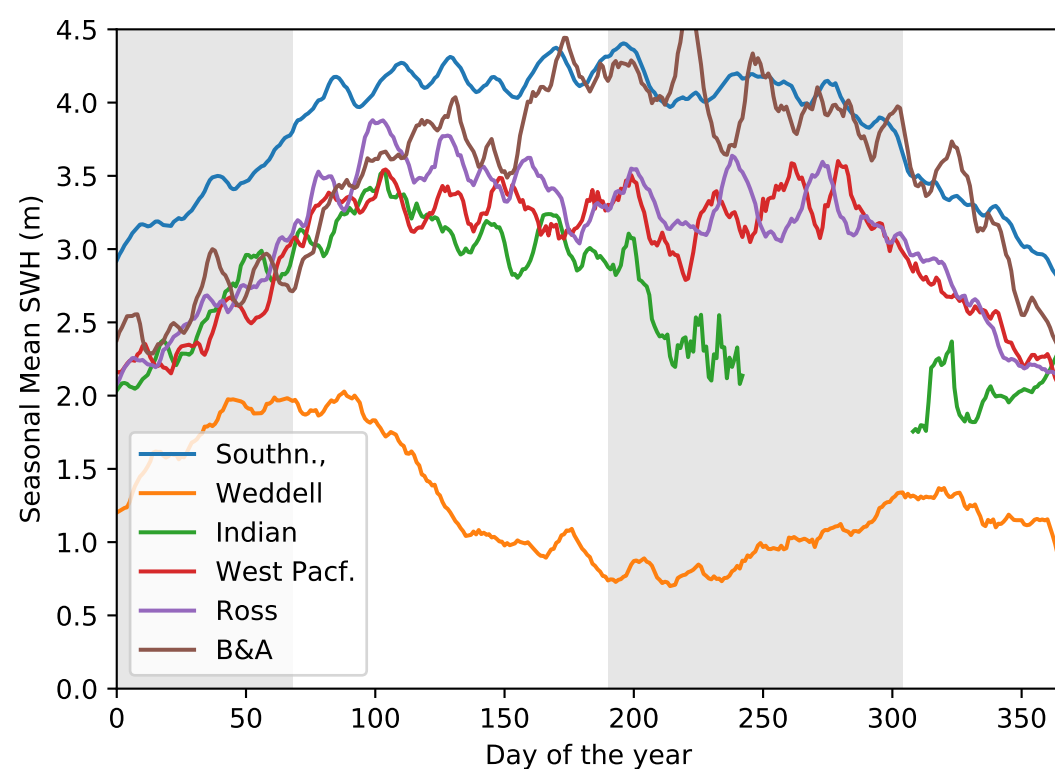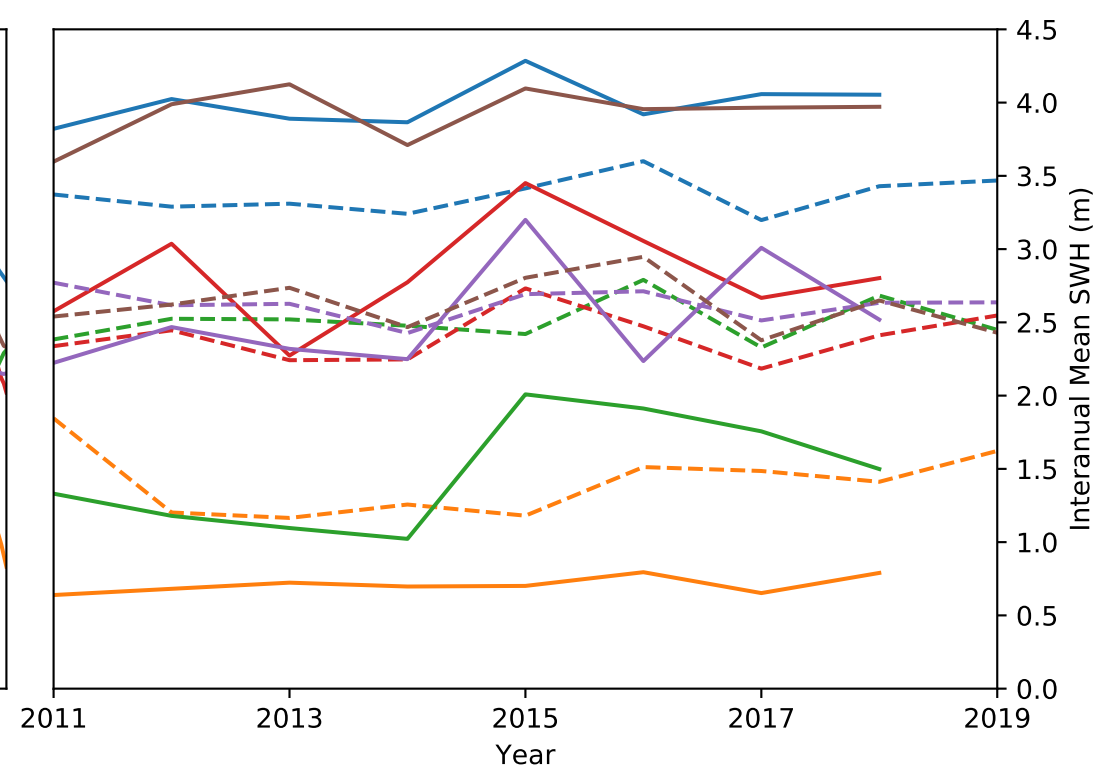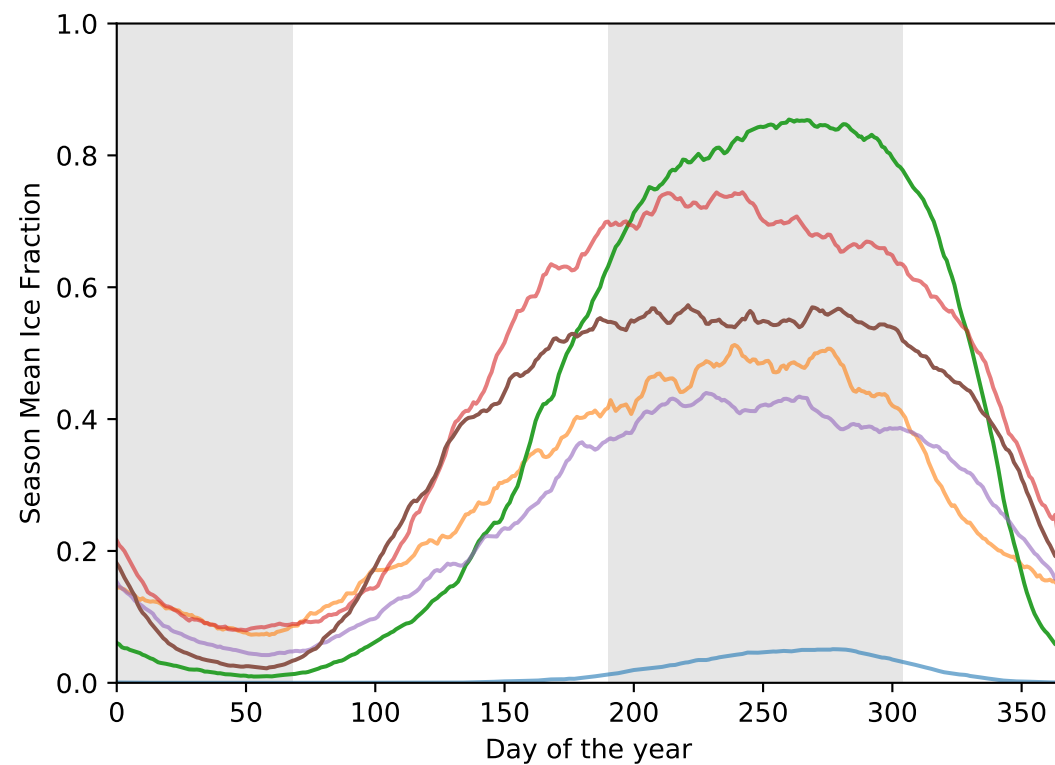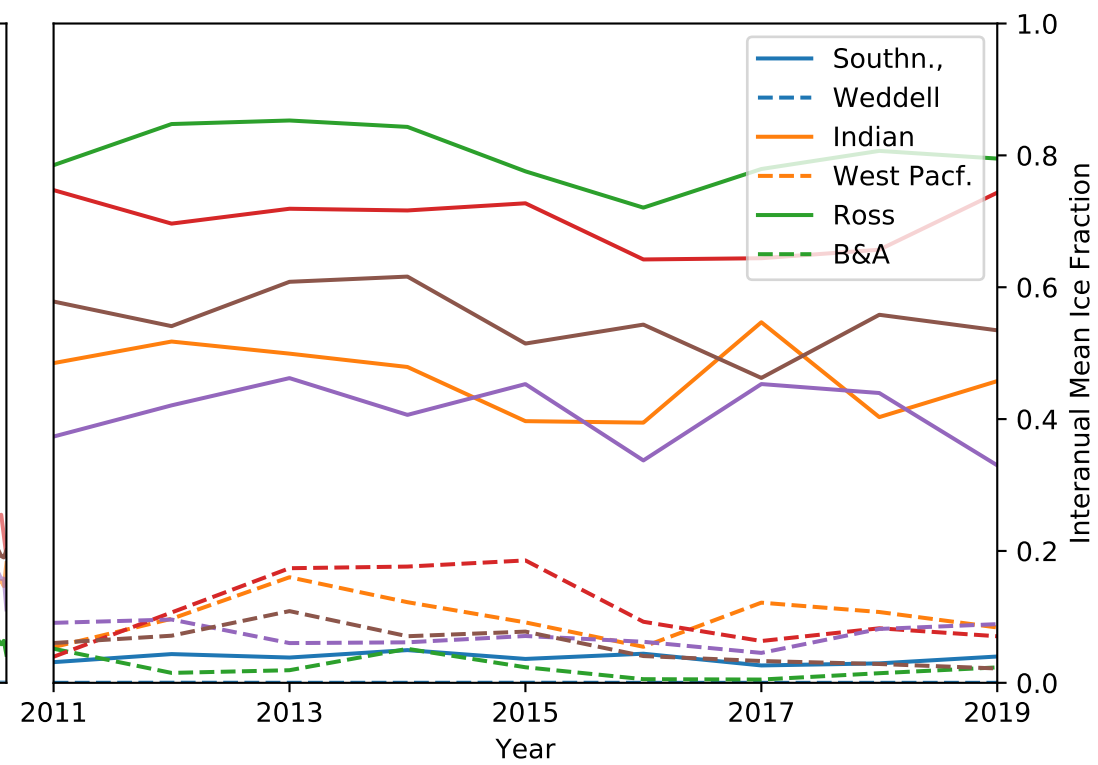

Supplement: s1 [file s1]
